# Supplementary material for: Aerosol optical depth climatology from the high–resolution MAIAC product over Europe: differences between major European cities and their surrounding environments
Source: Copernicus journal article supplement (doi:10.5194/egusphere-2023-1280), 2023-06-27
Supplement: Supplementary file 1 [file egusphere-2023-1280-supplement.pdf]

Supplementary

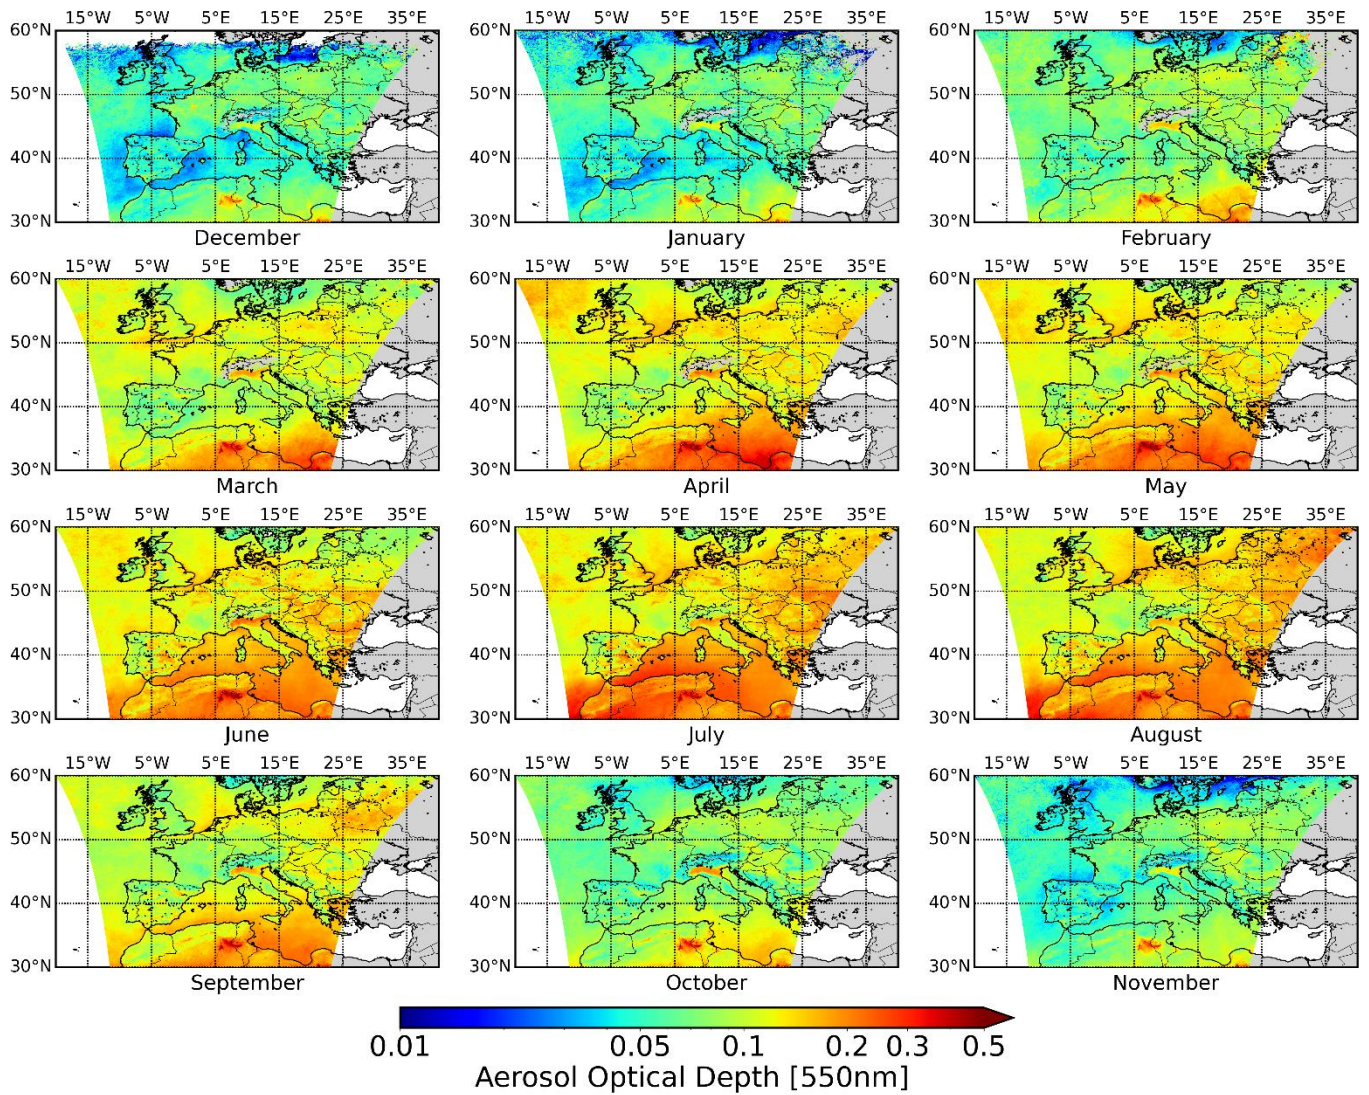

Figure S1: Climatological monthly mean of the Aerosol Optical Depth at 550 nm over the period 2000–2021.

5

10

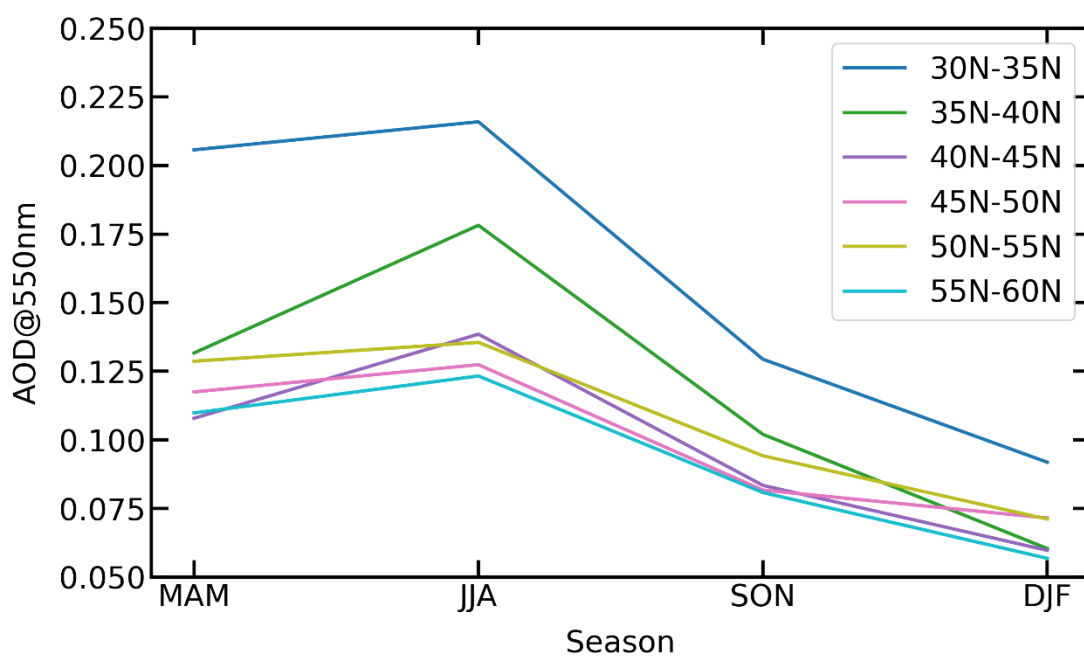

**Figure S2: Seasonal and latitudinal climatological averages of Aerosol Optical Depth at 550 nm from the MAIAC product.**

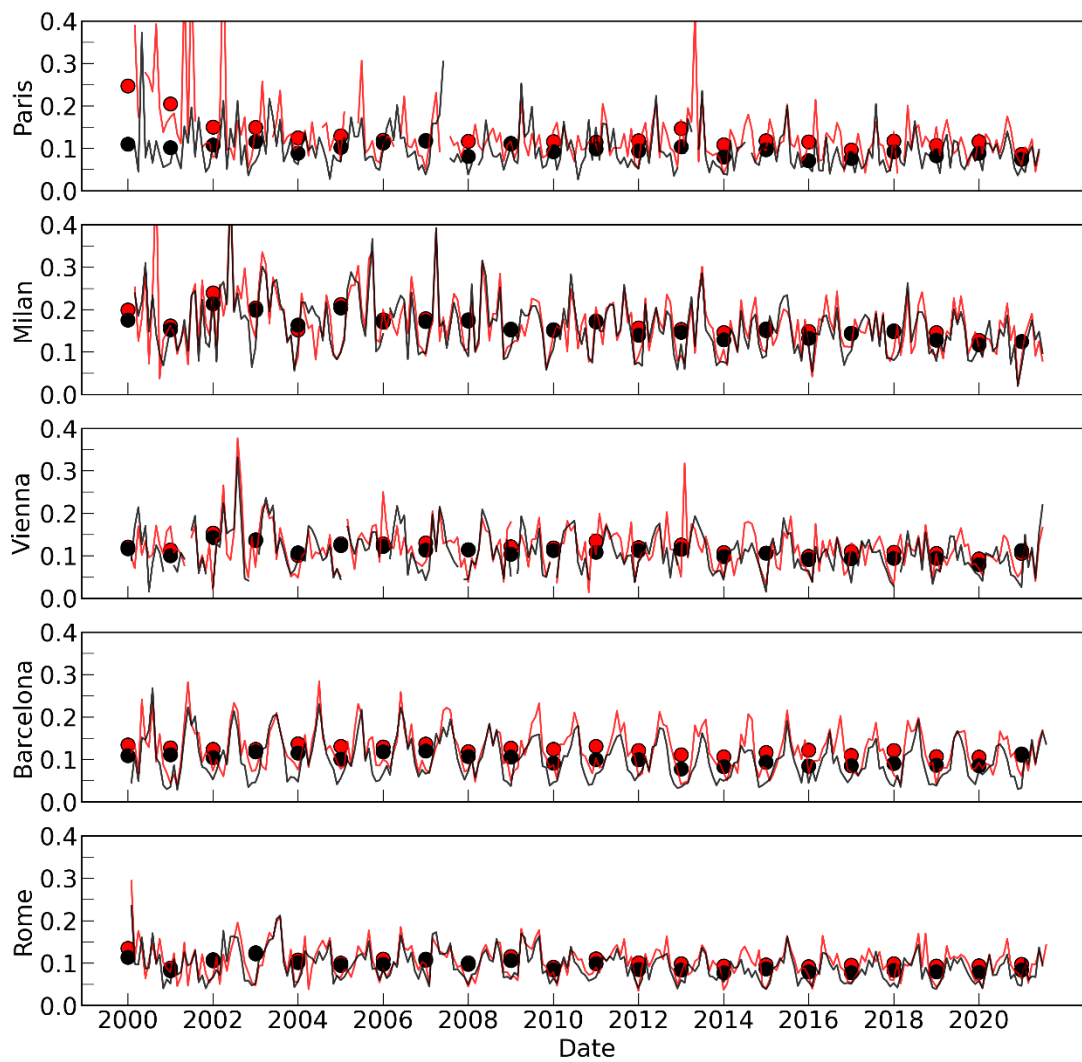

— Local - monthly mean      — Regional - monthly mean  
 ● Local - yearly mean      ● Regional - yearly mean

**Figure S3: Time series of monthly and yearly local and regional Aerosol Optical Depth at 550 nm from the MAIAC product for five different cities: Paris, Milan, Vienna, Barcelona, Rome.**
